1 **Perturbation of *in vivo* neural activity following  $\alpha$ -Synuclein**  
2 **seeding in the olfactory bulb**

3

4

5 Aishwarya S. Kulkarni<sup>a</sup>, Maria del Mar Cortijo<sup>a</sup>, Elizabeth R. Roberts<sup>a</sup>, Tamara L. Suggs<sup>a</sup>,  
6 Heather B. Stover<sup>a</sup>, José I. Pena-Bravo<sup>a</sup>, Jennifer A. Steiner<sup>b</sup>, Kelvin C. Luk<sup>c</sup>, Patrik  
7 Brundin<sup>b</sup>, Daniel W. Wesson<sup>a,\*</sup>

8

9

10 <sup>a</sup>Department of Pharmacology & Therapeutics  
11 University of Florida  
12 1200 Newell Dr.; Gainesville, FL, 32610, U.S.A.

13

14 <sup>b</sup>Center for Neurodegenerative Science, Van Andel Institute, Grand Rapids, MI, 49503,  
15 U.S.A.

16

17 <sup>c</sup>Department of Pathology and Laboratory Medicine, Center for Neurodegenerative  
18 Disease Research and Institute on Aging, University of Pennsylvania School of Medicine,  
19 Philadelphia, PA, 19104, USA.

20

21

22 \*corresponding author: [danielwesson@ufl.edu](mailto:danielwesson@ufl.edu)

23

24 RUNNING HEAD: *in vivo* physiology and  $\alpha$ -Synuclein

25

26

27

28

29 **Abstract**

30 **BACKGROUND:** Parkinson's disease (PD) neuropathology is characterized by  
31 intraneuronal protein aggregates composed of misfolded  $\alpha$ -Synuclein ( $\alpha$ -Syn), as well as  
32 degeneration of substantia nigra dopamine neurons. Deficits in olfactory perception and  
33 aggregation of  $\alpha$ -Syn in the olfactory bulb (OB) are observed during early stages of PD,  
34 and have been associated with the PD prodrome, before onset of the classic motor  
35 deficits.  $\alpha$ -Syn fibrils injected into the OB of mice cause progressive propagation of  $\alpha$ -Syn  
36 pathology throughout the olfactory system and are coupled to olfactory perceptual  
37 deficits. **OBJECTIVE:** We hypothesized that accumulation of pathogenic  $\alpha$ -Syn in the OB  
38 impairs neural activity in the olfactory system. **METHODS:** To address this, we monitored  
39 spontaneous and odor-evoked local field potential dynamics in awake wild type mice  
40 simultaneously in the OB and piriform cortex (PCX) one, two, and three months following  
41 injection of pathogenic preformed  $\alpha$ -Syn fibrils in the OB. **RESULTS:** We detected  $\alpha$ -Syn  
42 pathology in both the OB and PCX. We also observed that  $\alpha$ -Syn fibril injections  
43 influenced odor-evoked activity in the OB. In particular,  $\alpha$ -Syn fibril-injected mice  
44 displayed aberrantly high odor-evoked power in the beta spectral range. A similar change  
45 in activity was not detected in the PCX, despite high levels of  $\alpha$ -Syn pathology.  
46 **CONCLUSIONS:** Together, this work provides evidence that synucleinopathy impacts *in*  
47 *vivo* neural activity in the olfactory system at the network-level.

48

49

50 **Keywords:** Parkinson's disease; Dementia; olfaction; synucleinopathy; Lewy pathology,  
51 piriform cortex; olfactory bulb; local field potential

52

53

54

55

## 56 Introduction

57 In addition to loss of substantia nigra dopamine neurons, a major pathological  
58 hallmark of Parkinson's disease (PD) is the presence of Lewy bodies and Lewy neurites,  
59 primarily composed of insoluble misfolded aggregates of  $\alpha$ -Synuclein ( $\alpha$ -Syn) (Goedert,  
60 2001; Spillantini et al., 1997). Braak and colleagues (Braak et al., 2004, 2003a),  
61 suggested that in the early stages of PD pathogenesis,  $\alpha$ -Syn aggregates accumulate in  
62 olfactory structures, including the olfactory bulb (OB), and the enteric nervous system  
63 before appearing in other brain regions. Interestingly, ~90% of individuals with PD  
64 exhibited olfactory deficits (Doty, 2012; Doty et al., 1988) prior to the onset of classic  
65 motor symptoms (Mahlknecht et al., 2015; Ross et al., 2008; Wu et al., 2011). Therefore,  
66 it is possible that pathogenic  $\alpha$ -Syn aggregates within the olfactory system underlie the  
67 olfactory perceptual deficits observed in PD.

68 Recent studies in experimental animals have demonstrated that intracerebral  
69 inoculation of brain homogenates derived from mice and humans with synucleinopathy,  
70 or seeding recombinant pre-formed fibrils (PFFs) of  $\alpha$ -Syn, triggers  $\alpha$ -Syn pathology *in*  
71 *vivo* and *in vitro* (e.g., (Luk et al., 2012, 2009; Luk and Lee, 2014; Peelaerts et al., 2018;  
72 Rey et al., 2013). Injection of PFFs into the OB results in the spread of pathology between  
73 anatomically connected brain regions, including the piriform cortex (PCX) (Mason et al.,  
74 2016; Mezas et al., 2020; Rey et al., 2018a, 2016). Although the relationship between  
75 PD pathology and olfactory dysfunction are being explored clinically (Doty, 2017; Lee et  
76 al., 2014; Rey et al., 2018b; Wattendorf et al., 2009; Wen et al., 2017), the mechanisms  
77 underlying olfactory deficits in PD are unclear and animal modelling might provide insight  
78 into how neural processing is perturbed.

79 In both humans and rodents, initial odor processing occurs in the OB where  
80 olfactory receptor neurons in the nasal epithelium synapse to form OB glomeruli.  
81 Following local synaptic processing of this input (Schoppa and Urban, 2003; Wachowiak  
82 and Shipley, 2006) odor evoked information is then transferred to several secondary  
83 olfactory structures, including the PCX (Scott et al., 1980). As the primary region for  
84 processing odors, the OB is crucial for the basic initial aspects of olfaction, including the

85 fundamental ability to detect and recognize odors. Additionally, the PCX contributes to  
86 higher-order aspects of odor perception including odor learning (Gottfried, 2010; Wilson  
87 and Sullivan, 2011). Therefore, any perturbations in odor information processing through  
88 the local neural activity of the OB and/or the PCX could result in perceptual changes  
89 (Doucette et al., 2007; Nusser et al., 2001; Wilson, 2001). Thus, accumulation of  $\alpha$ -Syn  
90 in the OB and PCX in persons with PD (Braak et al., 2003b; Doty, 2012) and olfactory  
91 deficits observed in PD (for review (Rey et al., 2018b)) led us to propose that pathogenic  
92  $\alpha$ -Syn perturbs olfactory neural activity.

93         Prior *in situ* and *ex vivo* studies have established that the natively unfolded form of  
94  $\alpha$ -Syn can modulate synaptic activity (Burré, 2015; Burré et al., 2010; Chandra et al.,  
95 2004). One study used brain surface electroencephalography to uncover changes in  
96 network activity of transgenic mice overexpressing human  $\alpha$ -Syn (Morris et al., 2015).  
97 However, no studies to date have determined whether there are effects of pathogenic  $\alpha$ -  
98 Syn assemblies on *local* neural activity *in vivo*. Here we use the olfactory system as a  
99 model to determine the influence of  $\alpha$ -Syn aggregates on neural activity in awake animals.  
100 Specifically, we examined spontaneous and odor-evoked local field potentials (LFPs)  
101 within the OB and PCX of mice. LFPs reflect aggregate network activity (Buzsáki et al.,  
102 2012; Mitzdorf, 1985), and in the olfactory system, LFPs are comprised of three spectral  
103 bands, including theta (2-12 Hz), beta (15-35 Hz) and gamma (40-80 Hz). These bands  
104 are thought to play unique roles in the olfaction (Kay et al., 2009). Adding to their  
105 significance, beta and gamma oscillations in key basal ganglia structures are perturbed  
106 in PD (Burciu and Vaillancourt, 2018; Little and Brown, 2014; McCarthy et al., 2011).

107         Here we tested the hypothesis that accumulation of pathogenic  $\alpha$ -Syn in the  
108 olfactory system leads to aberrant LFP activity. Through multi-site LFP recordings in  
109 awake mice following  $\alpha$ -Syn PFF seeding in the OB, we found that  $\alpha$ -Syn PFF seeding  
110 impairs olfactory oscillatory network activity. We present evidence that synucleinopathy  
111 impacts *in vivo* neural activity in the olfactory system in manners which might contribute  
112 to the olfactory deficits associated with early PD and the prodrome of the disease.

## 114 **Materials and Methods**

### 115 *Experimental subjects*

116 A schematic of the experimental timeline is displayed in **Figure 1A**. A total of 57  
117 female C57BL/6J mice (from donor stock originating at the Jackson Laboratory, Bar  
118 Harbor, ME) were bred and maintained in a University of Florida, Gainesville, FL vivarium.  
119 Mice were group housed until intra-cranial electrode implants as described below, with  
120 food and water available *ad libitum*. We selected female mice in order to follow the  
121 methods of previous work which characterized pathological Pser129 expression  
122 throughout the brain following OB injections of  $\alpha$ -Syn PFFs in females (Rey et al., 2018a,  
123 2016). While estrous stage was not monitored in the present mice, it is likely that they  
124 were in various stages of estrous on the days of recordings. Therefore, the influence of  
125 estrous cycle, if any, on the physiological measures likely averaged out. All animal  
126 procedures were approved by the University of Florida Institutional Animal Care and Use  
127 Committee and were conducted in accordance with the guidelines of the National  
128 Research Council.

129

### 130 *Sonication and PFF handling*

131 Purified recombinant full-length mouse  $\alpha$ -Syn (as described in Volpicelli-Daley et  
132 al., 2014) was thawed at room temperature, and sonicated in a cup horn sonicator  
133 (QSonica, Q700, Newton, CT) to yield short length PFFs (**Fig. 2**). During sonication  
134 (amplitude of 50, process time of 3 mins with 1 s ON and 1 s OFF cycles), care was made  
135 to ensure the sample was submerged in water, to ensure consistent sonication power of  
136 the sample. Sonicated PFFs were stored at room temperature until being microinjected  
137 into the brain as described below.

138

### 139 *Electron microscopy*

140 Electron microscopy was used to verify optimal PFF sonication in two separate  
141 runs of PFF samples (**Fig. 2**) following the guidelines recommended by (Polinski et al.,

142 2018). The PFF samples from both runs were sonicated as described above. To allow for  
143 visualization and quantification of sonicated individual fibrils, the sonicated sample (not  
144 that injected into the experimental animals) was diluted (1:4) in PBS prior to imaging. The  
145 sonicated PFFs were then absorbed onto 400 mesh carbon coated grids (Electron  
146 Microscopy Sciences, Hatfield, PA) and stained with 1% uranyl acetate for subsequent  
147 electron microscopic imaging to confirm optimal sonication and thus fibril lengths. All  
148 images were captured with a Tecnai G2 Spirit TWIN 120 kV transmission electron  
149 microscope (FEI Company, Hillsboro, OR) equipped with an UltraScan 1000 (2k x 2k  
150 resolution) CCD camera (Gatan Inc., Pleasanton, CA). Fibril lengths were measured in  
151 Fiji Image J (Schindelin et al., 2012).

152

### 153 *Surgical procedures and animal care*

#### 154 *OB microinjections*

155 We injected PFFs unilaterally in the OB of the mice no later than 3 hours after  
156 sonication as described above. Briefly, mice were anaesthetized with isoflurane (~3% in  
157 1 l/min of O<sub>2</sub>) and mounted in a stereotaxic frame accompanied with a water-filled heating  
158 pad in order to maintain body temperature (38°C). Marcaine (1.7 mg/ml, s.c.; Hospira Inc.,  
159 Lake Forest, IL) was injected into the site of the future wound margin. The analgesic  
160 meloxicam was also provided s.c. (5 mg/ml; Putney Inc, Overland Park, KS), and  
161 following, a midline incision was made to expose the skull cap. Next, a craniotomy (~0.5  
162 mm) was drilled in order to access the right OB (5.4 mm anterior to bregma, 0.75 mm  
163 lateral) and injected with either 800 nl of sterile PBS (pH 7.4; Gibco, Fisher Scientific,  
164 Hampton, NH) or 800 nl of sonicated PFFs using a glass micropipette at 2 nl/sec (1 mm  
165 ventral in the OB). Following the injection, and a resting period of 3 mins, the micropipette  
166 was gently withdrawn from the injection site at a rate of 200 µm/min. Following injections,  
167 the mice from all cohorts received *ad libitum* access to food and water, and were allowed  
168 to recover on a heating pad for at least 8 hrs.

169

#### 170 *Implantation of LFP electrodes*

171           Following injection of PFFs, and either 1, 2, or 3 months follow up periods, all mice  
172 were again sedated and prepared for cranial surgery as outlined above; this surgery  
173 included implantation of two pairs of twisted teflon-coated stainless steel bipolar  
174 electrodes (catalog # 791500, 0.005" diameter; A-M systems, Carlsborg, WA). The  
175 electrodes were implanted ipsilaterally to the PFF injection into both the OB and PCX.  
176 The OB coordinates were 3.8 mm anterior from bregma, 1 mm lateral, 1 mm ventral and  
177 the PCX coordinates were 0 mm bregma, 3.4 mm lateral, and 4 mm ventral. A third  
178 craniotomy was drilled over the contralateral cortex for the placement of a single stainless  
179 steel electrode to serve as the ground (catalog # 792900, 0.008" diameter, A-M Systems).  
180 This assembly was then cemented onto the skull along with a small plastic head-bar for  
181 subsequent head-fixation as defined below. After surgery, the mice were singly housed  
182 and allowed to recover on a heating pad for at least 8 hrs. These implanted mice had *ad*  
183 *libitum* access to food, water, and received subcutaneous meloxicam daily for 3 days (5  
184 mg/kg).

185

#### 186 *Outline of experimental groups*

187           Mice were divided into two treatment groups (*i.e.*, PBS or PFF treated) and  
188 survived for 3 different durations post injection (1, 2, or 3 months). All mice were injected  
189 at 2-3 months of age (mean age upon injection:  $64 \pm 1.5$  days (mean  $\pm$  SEM)). Total  
190 animals per group include PBS: 1 ( $n= 9$ ), 2 ( $n=10$ ), or 3 ( $n=8$ ) months post injection and  
191 PFF: 1 ( $n= 8$ ), 2 ( $n=10$ ), or 3 ( $n=12$ ) months post injection.

192

#### 193 *Awake LFP recordings and data acquisition*

194           We recorded spontaneous and odor-evoked LFP activity from 17 mice at 1 month  
195 post injection ( $n= 9$  PBS,  $n= 8$  PFF), 20 mice at 2 months post injection ( $n= 10$  PBS,  $n=$   
196  $10$  PFF), and 20 mice at 3 months post injection ( $n= 8$  PBS,  $n= 12$  PFF). During any given  
197 day, mice of more than one condition [1, 2, or 3 months post injection and/or PBS/PFF  
198 treatment group] were used in recordings. A schematic of the recording session structure



199 is shown in **Figures 3A & 3B**. All the recordings were performed in a dimly-lit, well-  
200 ventilated room maintained at 20-22°C, between 0900 and 1800 hrs.

201 Mice were head-fixed and an odor-port was positioned ~2 cm from the nose, prior  
202 to the start of the recordings, as we have described previously (Gadziola et al., 2015). To  
203 monitor spontaneous LFP activity, we allowed the animal to rest during head-fixation for  
204 several minutes (~5 mins) prior to and following a series of odor deliveries (**Fig. 3B**).  
205 While optimally, animals would have been habituated to this paradigm for days to mitigate  
206 stress which may influence neural activity, in order to reduce variability within groups, we  
207 sought to strictly schedule and record from each animal on a single day at a precise time  
208 post injection. All odors and the blank stimulus (mineral oil) were presented for 4 secs  
209 each, in a semi-automated pseudorandom order for a total of 4 times each, with an  
210 approximately 15 secs inter-stimulus interval. Throughout recordings, OB and PCX  
211 activity was acquired at 2 kHz and filtered (100 Hz, 2<sup>nd</sup> order low-pass, 60 Hz notch) along  
212 with stimulus presentation events using a Tucker Davis Technologies RZ5D amplifier  
213 (Alachua, FL).

214

### 215 *Stimulus delivery*

216 For odor presentation, odors including isopentyl acetate, 2-butanone, and 1,7-  
217 octadiene (Sigma Aldrich, St. Louis, MO) were each diluted in their liquid state to 133.332  
218 Pa (1 Torr) and 266.645 Pa (2 Torr) in light mineral oil (Sigma Aldrich) which also served  
219 as the blank stimulus. Stimulus vapors controlled with an air-dilution olfactometer were  
220 run from glass headspace vials (100 ml/min) where they were later blended with clean  
221 nitrogen (900 ml/min) in the odor port thereby yielding a total odor flow rate of 1 L/min.  
222 The olfactometer was equipped with independent stimulus lines up to the point of entry  
223 into a Teflon odor port, in order to eliminate chances of cross-contamination of the stimuli  
224 and also to allow for rapid temporal control of odor dynamics as they reach the animal.  
225 To confirm the dynamics of the odor plume as it leaves the odor port, we used a  
226 photoionization detector (Aurora Scientific, Aurora CO). As shown in **Figure 3C**, odor  
227 delivery occurred rapidly, and was largely stable throughout the 4 sec of delivery.



228

229 *Tissue collection and histology*

230           Within 48 hrs after recordings, the mice were overdosed with Fatal-plus (0.01 ml/g;  
231 Vortech Pharmaceutical Ltd, Dearborn, MI). Following confirmation of deep sedation, they  
232 were perfused with cold saline and subsequently 10% phosphate buffered formalin.  
233 Brains were collected and stored at 4 °C in 10% formalin / 30% sucrose prior to sectioning.  
234 Serial 40 µm thick coronal sections were collected using a sliding microtome, and stored  
235 in Tris-buffered saline (TBS, pH 7.4) with 0.03% sodium azide. These sections were used  
236 for electrode verification and phosphoserine 129 (Pser129) immunofluorescence.

237

238 *Pser129 immunofluorescence*

239           Presence of Pser129  $\alpha$ -Syn-immunopositive inclusions is considered pathological  
240 given the abundance of this post-translationally modified form of  $\alpha$ -Syn in Lewy pathology  
241 (Fujiwara et al., 2002). Our previous work has also shown that Pser129  $\alpha$ -Syn-  
242 immunopositive inclusions in the animal model we used in the present study are positive  
243 for ubiquitin, p62, Thioflavin S and are Proteinase K resistant, all features of clinical Lewy  
244 pathology (Rey et al., 2016). Thus, we used Pser129 immunofluorescence to quantify  
245 pathological burden resultant from OB PFF or PBS microinjections (the latter as a  
246 control). Floating OB and PCX sections from PFF and PBS injected mice were rinsed  
247 thrice in TBS and subsequently, dilution buffer (10 mins each). The dilution buffer was  
248 comprised of 2% bovine serum albumin (Sigma Aldrich), 0.9% sodium chloride (Sigma  
249 Aldrich), 0.4% Triton-X 100 (Sigma Aldrich), and 1% normal goat serum (Sigma Aldrich)  
250 in TBS. Next, the sections were blocked in 20% normal donkey serum (Sigma Aldrich) in  
251 TBS for 20 mins and incubated for 24 hrs in primary antibody rabbit anti-Pser129 (1:5000  
252 in dilution buffer, catalog # EP1536Y, Abcam, Cambridge, MA) at room temperature. On  
253 the following day, all sections were rinsed four times in dilution buffer (10 mins) and  
254 incubated for 2 hrs in secondary antibody Alexa Fluor 594 goat anti-rabbit IgG (1:500 in  
255 dilution buffer, catalog # A11012, Invitrogen, Carlsbad, CA). Sections were rinsed thrice  
256 in TBS and twice in double distilled water (5 mins each). Finally, tissue was placed on

257 slides and cover-slipped with mounting media containing DAPI (Fluoromount-G; 4',6-  
258 diamidino-2-phenylindole; Invitrogen). All immunofluorescence runs contained tissue  
259 from more than one age (1, 2, or 3 months post injection) and treatment group (PBS or  
260 PFF).

261

### 262 *Electrode verification*

263 PCX electrode tips/recording sites were verified with microscopy. Due to the ease  
264 of targeting, not all mice used in the study underwent exclusive examination for electrode  
265 tip placement in the OB. For PCX recording site verification, tissue processed for anti-  
266 Pser129 immunofluorescence (counterstained with DAPI) was used. When additional  
267 sections were needed for confirmation of recording sites, additional PCX tissue was  
268 placed on slides and counter-stained with DAPI. Only one mouse (PBS, 2 months post  
269 injection) did not contribute PCX data since the electrode was misplaced. The total  
270 numbers of animals contributing data / brain region is defined below. Representative  
271 images of electrode tips localized in the OB and separately in the PCX are displayed in  
272 **Figure 1B**.

273

### 274 *Pser129 imaging and quantification*

275 The OB and PCX were identified based on an established brain atlas (Paxinos and  
276 Franklin, 2000). Images of the OB and PCX were acquired from the hemisphere ipsilateral  
277 (identified from the electrode tracks) to the OB microinjection. All Pser129 imaging was  
278 performed with a Nikon Ti2e microscope equipped with a 15MP monochrome camera  
279 and using 20X magnification. Additionally, image acquisition settings, particularly the  
280 gain, light intensity, and exposure were kept constant for all images. First, images were  
281 collected which included the OB and PCX ( $\geq 4$  images/region). Attempts were made to  
282 acquire images from similar anterior-posterior extents of each brain area. Next, by a  
283 treatment group blind experimenter, the images were cropped so that the resultant image  
284 included solely OB and PCX, and that the images spanned the majority of cell layers, as  
285 exemplified in **Figure 4**. Also by a treatment group blind experimenter, these cropped

286 images were next thresholded using semi-automated routines in Nikon Elements and with  
287 fixed settings across all images for later quantification of Pser129 levels. The % area in  
288 each of the cropped and thresholded images occupied by Pser129 was then calculated  
289 as a ratio of the pixel area above threshold : the total pixel area. Representative images  
290 showing Pser129 burden in the OB and PCX are presented in an inverted grayscale (**Fig.**  
291 **4B**), to allow ease of visualization of puncta, although all of the data analysis steps  
292 outlined above occurred in the original high-resolution color images.

293

### 294 *Analysis and Statistics*

295 In total, we acquired spontaneous and odor-evoked LFP activity from 17 mice at 1  
296 month post injection ( $n= 9$  PBS,  $n= 8$  PFF), 20 mice at 2 months post injection ( $n= 9$  PBS,  
297  $n= 10$  PFF), and 20 mice at 3 months post injection ( $n= 8$  PBS,  $n= 12$  PFF). As described  
298 in the electrode verification section above, these numbers only include mice which had  
299 electrodes verified in each of the target brain regions. All of these mice contributed clean  
300 artifact free signals and also passed the electrode placement confirmation described  
301 above.

302 Analysis of the LFP data was performed by experimenters blinded to the  
303 experimental groups using Spike 2 (Cambridge Electronic Design, Milton, Cambridge).  
304 Data were processed using Fast Fourier Transform (FFT) analysis [for spontaneous  
305 (1.006 secs Hanning window and 0.994 Hz resolution) and odor evoked (0.503 sec  
306 Hanning window and 1.987 Hz resolution)] in order to classify and distribute the data  
307 within different LFP frequency bands. While due to the time-window sizes, we used  
308 differing FFT resolutions for the above calculations, no comparisons are made between  
309 the spontaneous and odor-evoked events. Power spectra of spontaneous and odor-  
310 evoked LFP activity were extracted from 0-100 Hz. LFP spectral bands were defined as  
311 theta (1-10 Hz), beta (10-35 Hz), and gamma (40-70 Hz) (Kay et al., 2009). OB-PCX  
312 spontaneous LFP activity was analyzed over a duration of 200 secs sampled both prior  
313 to and following presentation of odors (at the start and end of the recording session  
314 respectively). Odor-evoked response magnitude was used as a variable to measure odor-  
315 evoked LFP activity. OB-PCX odor-evoked response magnitude is a ratio of time matched

316 (4 secs) LFP power during odor presentation to LFP power before odor presentation.  
317 Herein we focus our odor-evoked analyses solely on 1 Torr isopentyl acetate trials. This  
318 is based upon the inconsistent responses elicited by 2-butanone and 1,7-octadiene in all  
319 mice, including those PBS treated. Further, when collapsing across groups, we did not  
320 find an effect of 1 Torr versus 2 Torr intensity of isopentyl acetate and so for simplicity we  
321 restrict all analyses to 1 Torr isopentyl acetate.

322 All statistical analyses were performed using Microsoft Excel and Graphpad Prism  
323 8 (San Diego, CA). Any comparison between PFF and PBS injected mice or between  
324 brain regions was conducted using 2-way ANOVA. Mixed effects analyses were used to  
325 test for possible time-post injection effects (1, 2, or 3 months post injection). Post-hoc  
326 analyses included multiple comparison corrections whenever appropriate. All data are  
327 reported as mean  $\pm$  SEM unless otherwise indicated.

328

329

## 330 **Results**

331 *Accumulation of Pser129 pathology in key olfactory structures following OB  $\alpha$ -Syn*  
332 *seeding.*

333 To induce  $\alpha$ -synucleinopathy in the olfactory system, PFFs or PBS as a control,  
334 were unilaterally injected into the OB of 2-3 months-old female mice. The mice were then  
335 allowed either 1, 2, or 3 months time post-injection prior to being implanted with electrodes  
336 into their OB and PCX, ipsilateral to the injection, and LFP recordings performed (**Fig. 1**)  
337 as described below. Following recordings, the brains were collected and processed for  
338 anti-Pser129 immunofluorescence. Confirming previous results using this OB PFF  
339 seeding model (Rey et al., 2018a, 2016), we observed Pser129 burden in key olfactory  
340 structures, including the OB itself and the PCX, in mice injected with PFFs (**Fig. 4**).  
341 Pser129 immunostaining was detected throughout all cell layers in both brain regions of  
342 PFF injected mice (**Fig. 4B**). There was a significant effect of PFF treatment on Pser129  
343 levels in the OB ( $F(1,36) = 10.56$ ,  $p = 0.003$ ), as well as the PCX ( $F(1,36) = 19.84$ ,  $p <$   
344  $0.0001$ ) (**Fig. 4C**). Additionally, across all time groups (1 to 3 mo), there was an effect of

345 brain region on Pser129 immunostaining indicating that the PCX was more vulnerable to  
346 accumulation of misfolded  $\alpha$ -Syn compared to the OB ( $F(1, 22) = 16.63, p = 0.0005$ ).  
347 There was a non-significant trend towards increased levels of Pser129 in the PCX in the  
348 3 versus the 1 month group ( $F(2,27) = 1.611, p = 0.218$ ) which is in contrast to the largely  
349 stable Pser129 levels within the OB from 1 to 3 months (**Fig. 4C**).

350

351 *Preservation of spontaneous LFP dynamics following  $\alpha$ -Syn seeding.*

352 We began our investigation into the influence of  $\alpha$ -Syn aggregates on LFP  
353 dynamics by analyzing spontaneous (*viz.*, those in the absence of experimentally-applied  
354 odors) levels of theta, beta, and gamma-band powers in the OB and PCX of mice that  
355 survived 1, 2, or 3 months post injection (the same mice used for histology above). As is  
356 well established (for review (Kay et al., 2009)), spontaneous OB and PCX LFP activity is  
357 characterized by prominent theta band power coupled to the respiratory cycles, along  
358 with beta and gamma band power which also occur in somewhat phasic manners with  
359 respiratory theta (**Fig. 5A & 5B**). Since the full spectrum is diverse in power (**Fig. 5B**), as  
360 is standard when quantifying olfactory LFPs, throughout this paper we calculated the  
361 power of each of these spectral bands separately and focused on testing for PFF  
362 treatment effects by comparing PBS vs PFF treated animals.

363 Despite the significant Pser129 burden in each structure (**Fig. 4**), we did not find  
364 an overall (across age groups) effect of PFF treatment on spontaneous activity in either  
365 the OB or PCX (**Fig. 6**). In the OB specifically, there was no change in theta ( $F(1,51) =$   
366  $0.993, p = 0.324$ ), beta ( $F(1,51) = 0.035, p = 0.853$ ), or gamma band powers ( $F(1,51) =$   
367  $0.013, p = 0.910$ ) when comparing PBS injected animals to those injected with PFFs (**Fig.**  
368 **6A**). Similarly in the PCX, we did not find an overall change in theta ( $F(1, 50) = 0.017, p$   
369  $= 0.897$ ), beta ( $F(1, 50) = 0.084, p = 0.774$ ), or gamma band powers ( $F(1, 50) = 0.073, p$   
370  $= 0.788$ ) in PBS versus PFF injected animals (**Fig. 6B**). Thus, despite pathogenic  
371 propagation of  $\alpha$ -Syn from the seeded structure (the OB) into a monosynaptically  
372 interconnected structure (the PCX), the spontaneous LFP activity in neither brain region  
373 was significantly disrupted.

374

375  *$\alpha$ -Syn seeding results in heightened OB beta-band odor-evoked activity.*

376 The OB and PCX are important for the formation of olfactory perception, and the  
377 processing of odor information in each of these stages is considered critical for olfaction.  
378 Odor-input drives increases in LFP activity in the OB (Kay et al., 2009). Beta band power  
379 is especially considered important for the coordinated transfer of sensory information  
380 between brain regions (Haegens and Zion Golumbic, 2018; Kopell et al., 2000) and thus  
381 any changes in beta activity during odor may be especially influential to perception.  
382 Therefore, we next took advantage of the monosynaptic and bisynaptic inputs of odor  
383 information into these structures by analyzing odor-evoked LFPs (**Fig. 7**) and how OB  
384 PFF seeding may impact odor-evoked activity. As expected based upon a wealth of prior  
385 research, odor-evoked increases in LFP power were observed in both the OB and PCX  
386 of PBS treated mice (**Fig. 7**, left panels). These example traces also suggested that the  
387 power may be different during odor in the PFF treated animals compared to those treated  
388 with PBS. To directly compare between groups, across all trials of the odor (1 Torr  
389 isopentyl acetate), we calculated the LFP spectral power during the 4 seconds odor was  
390 presented to the mouse's nose and also the 4 seconds immediately prior to odor delivery.  
391 We then computed the ratio of the during odor epoch : the pre-odor epoch, in order to  
392 calculate an odor-evoked power ratio. We then averaged the calculated ratios across all  
393 trials in the session (4-5 trials/animal) to calculate each animal's average odor-evoked  
394 power ratios as a simple measure of odor-evoked network activity (**Fig. 8**).

395 In the OB, while analyses of odor-evoked power ratios did not uncover an effect in  
396 either the theta ( $F(1, 50) = 0.944, p = 0.336$ ) or gamma bands ( $F(1, 50) = 0.389, p =$   
397  $0.536$ ), there was a significant effect of PFF treatment on increasing odor-evoked beta  
398 band power ( $F(1, 50) = 5.531, p = 0.023$ ) (**Fig. 8A**). Post-hoc tests within these spectral  
399 bands, and also within individual age groups, did not reveal a similar effect of PFF  
400 treatment ( $p > 0.05$ , Sidak's test for correction of multiple comparisons). Nevertheless,  
401 there is a clear elevation in beta-band odor evoked power ratios in the PFF-treated  
402 animals, which is comparable across the groups from 1 to 3 months post PFF injection.

403 In contrast to the OB, theta ( $F(1, 49) = 1.351, p = 0.251$ ), beta ( $F(1, 49) = 0.042, p$   
404  $= 0.839$ ), and gamma band odor-evoked powers ( $F(1, 49) = 3.380, p = 0.072$ ) were similar  
405 between PBS and PFF treated animals across all ages in the PCX (**Fig. 8B**). This  
406 indicates that, at least at the level of LFP monitoring, the effect of  $\alpha$ -Syn OB seeding is  
407 most dramatic in shaping OB odor-evoked activity. This is a significant finding since the  
408 OB provides nasal-derived odor information into the entirety of down-stream brain  
409 regions.

410

411 *Are the changes in beta-band dynamics correlated with Pser129 levels?*

412 Finally, we analyzed whether the levels of Pser129 immunostaining within the OB  
413 were correlated with the above levels in odor-evoked beta-band power. We focused on  
414 this possible relationship since the odor-evoked beta-band activity was significantly  
415 elevated in the OB following PFF injection (**Fig. 8**). Further, some PFF-treated animals  
416 contributed abnormally high levels of odor-evoked beta-band activity (**Fig. 8**, dark data  
417 point). Indeed, upon inspection, we determined that some of these mice were also those  
418 which displayed elevated Pser129 pathological burden in the olfactory system and that  
419 led us to predict these factors were related. Surprisingly, no significant correlation was  
420 found between levels of OB Pser129 and odor-evoked power ratios within beta activity in  
421 the OB (Pearson  $r(28) = 0.156, p = 0.411$ ) (**Fig. 9**). Since, as discussed earlier, beta band  
422 activity in the OB may originate from centrifugal input coming from the PCX, we also  
423 tested whether a correlation exists between OB odor-evoked beta power and PCX  
424 Pser129 levels, yet also found no significance (Pearson  $r(28) = -0.018, p = 0.923$ ) (not  
425 shown). Thus, the aberrant odor-evoked beta band activity observed in PFF treated mice  
426 is not correlated with levels of Pser129 pathology.

427

## 428 **Discussion**

429 We tested the hypothesis that progressive development of  $\alpha$ -Syn aggregates in  
430 the olfactory system impacts neural dynamics. While key regions within the basal ganglia  
431 system display aberrant synchrony of neural dynamics which may contribute to motor



432 deficits in PD (Brown and Williams, 2005; De Hemptinne et al., 2015; Hammond et al.,  
433 2007; Kühn et al., 2006; Moran et al., 2008), the direct contributions of  $\alpha$ -Syn aggregates  
434 to neural dynamics *in vivo* are unresolved. This is an important question because  
435 hyposmia is prevalent in PD, and often develops before the onset of clear motor deficits.  
436 Furthermore, greater insight into the impact of  $\alpha$ -Syn aggregates on neural circuits is  
437 important for our understanding of functional deficits in PD and related synucleinopathies.  
438 Perturbations in neural synchrony might be highly relevant to the symptomology of clinical  
439 synucleinopathies since they may alter key aspects of function, from cognitive, motor, to  
440 sensory – depending upon the system impaired.

441 We used  $\alpha$ -Syn seeding in mice in combination with olfactory LFP recordings. The  
442 olfactory system is an excellent model to test whether pathogenic  $\alpha$ -Syn impacts neural  
443 dynamics, given both the known aggregation of Lewy bodies in the OB during the earliest  
444 states of PD, and decades of work carefully examining the dynamics of LFPs in the OB  
445 and PCX, including how these dynamics are influenced by odors. Importantly, LFPs are  
446 reflective of aggregated network activity (Buzsáki et al., 2012; Mitzdorf, 1985) and are  
447 considered a substrate for the rhythmic sampling of sensory information (Haegens and  
448 Zion Golumbic, 2018). Therefore, changes in LFPs may impact odor perception. Here we  
449 found that the progressive development of  $\alpha$ -Syn aggregates influenced specific sensory-  
450 evoked LFP activity in region-selective manners (*viz.*, not all brain regions were equally  
451 affected).

452

453 *Reconciling Pser129 pathology with that of previous studies.*

454 The OB seeding model we used is associated with impaired odor perception, yet  
455 spared motor function (Johnson et al., 2020; Rey et al., 2016). We found, as expected,  
456 that injection of  $\alpha$ -Syn PFFs into one OB triggered  $\alpha$ -Syn accumulation of intraneuronal  
457 Pser129 immunoreactive aggregates in both the OB and in inter-connected olfactory  
458 structures, particularly in the PCX (**Fig. 4**) which has dense reciprocal connection with the  
459 OB. PFF injected mice had significantly greater Pser129 levels compared to mice injected  
460 with PBS. Based on prior studies demonstrating Pser129 immunoreactivity in olfactory  
461 brain regions of mice following PFF injections (Rey et al., 2018a, 2016), we interpret the

462 Pser129 immunofluorescence we observe in the PCX as being the consequence of  
463 seeding of endogenous  $\alpha$ -Syn. The uptake pattern we observed is similar to that  
464 previously reported (Rey et al., 2016, 2013). Herein and in our earlier studies (Rey et al.,  
465 2018a, 2016), injection of PFFs into the OB resulted in elevations in Pser129 relative to  
466 the time following seeding. While there was no elevation over time of Pser129 staining in  
467 the OB itself, the PCX did show subtle increases in pathology from 1 to 3 months post  
468 seeding, albeit not significant. Also similar to our earlier studies (Rey et al., 2016, 2013),  
469 we found significantly greater levels of Pser129 in the PCX than the OB.

470

471  *$\alpha$ -Syn PFF injection influences odor-evoked beta band activity.*

472 Monitoring the spontaneous and odor-evoked LFP activities simultaneously in both  
473 the OB and PCX revealed elevations in OB beta-band power in mice with Pser129-  
474 positive aggregates. There are several points worthy of discussion in this regard, which  
475 we organize by oscillatory band:

476 *Theta band activity*

477 First, no changes were found in theta-band power, which is a prominent oscillatory  
478 power observed in both the OB and PCX. Theta oscillations in the OB are generated by  
479 intranasal afferent input, and OB and PCX theta cycles are often coupled to respiration  
480 (Kay et al., 2009; Kay and Stopfer, 2006; Komisaruk, 1970). The spared theta power  
481 observed herein suggests that OB  $\alpha$ -Syn pathology did not overtly alter the basic sensory-  
482 motor functions impacting the olfactory system (*i.e.*, respiration).

483 *Gamma band activity*

484 Reciprocal dendodendritic activity between OB granule and mitral / tufted cells  
485 generates gamma band activity (Shepherd, 1972). Odor-evoked OB gamma oscillations  
486 reflect the local network activity within the OB and PCX with gamma in the PCX  
487 considered to originate locally (Neville and Haberly, 2003; Rall and Shepherd, 1968). We  
488 did not find that PFF injection into the OB affected gamma band activity in either the OB  
489 or PCX, during the 3 months post-injection that we followed the mice.

490 *Beta band activity*

491 Our results indicate that  $\alpha$ -Syn aggregates, seeded by PFF injection into the OB,  
492 can generate elevations in beta band activity during odor-evoked states (**Fig. 8**). Beta  
493 oscillations reflect large-scale activity between interconnected structures (Kopell et al.,  
494 2000; Spitzer and Haegens, 2017) such as that between the OB and PCX (Kay and  
495 Beshel, 2010; Neville and Haberly, 2003).

496 We propose that the changes we uncovered in beta activity are particularly  
497 relevant to PD pathophysiology. Striatal and cortical beta band activity is elevated in  
498 persons with PD and deep brain stimulation, levodopa, and anti-cholinergic treatment  
499 may act by means of suppressing elevated beta power in the cortico-basal ganglia loop  
500 (Brown, 2006; Brown et al., 2001; Eisinger et al., 2020; Giannicola et al., 2010; Little and  
501 Brown, 2014; McCarthy et al., 2011). Additionally, deep brain stimulation of the  
502 subthalamic nucleus was shown in one study to improve cortical function in PD and  
503 reduce the excessive beta phase coupling of motor cortex neurons (De Hemptinne et al.,  
504 2015). Differences in beta band activity are proposed to be a network determinant of PD  
505 pathophysiology (Feingold et al., 2015). Our results indicate an important role for  $\alpha$ -Syn  
506 related pathologies in these clinical pathophysiologies.

507 Notably, beta oscillations increase depending upon sensory and cognitive  
508 demands (Bauer et al., 2006; Spitzer et al., 2010; Spitzer and Haegens, 2017; van Ede  
509 et al., 2010) and in the olfactory system beta oscillations are considered especially  
510 involved in odor learning (Gervais et al., 2007; Lowry and Kay, 2007; Martin et al., 2007).  
511 In our study, while the mice were awake while being delivered odors, they were not  
512 engaged in any task which may influence cognitive demand. Interestingly, in previous  
513 work using behavioral tests to assay odor detection and memory, progressive olfactory  
514 perceptual deficits, specifically in odor detection and odor retention (memory), were  
515 uncovered following injection of PFFs into the OB (Johnson et al., 2020; Rey et al., 2016).  
516 We propose that the aberrant OB odor-evoked beta-band activity we observed is likely  
517 to critically influence the PFF-induced changes in odor perception (Johnson et al., 2020;  
518 Rey et al., 2016).

519 We cannot exclude an effect of hormones and biological sex on the influence of  
520 PFF injections on beta activity. Work from many labs, including ours, has shown that  
521 olfactory system activity can be modulated by sex hormones, including estrogen (Doty  
522 and Cameron, 2009; Johnson et al., 2020; Phillips and Vallowe, 1975; Sorwell et al., 2008;  
523 Wesson et al., 2006). However, in our study it is unlikely all mice in each group  
524 ( $n > 8$ /group) were at a similar estrous stage during the recordings. Most likely, possible  
525 effects of estrous stage would be washed out within groups. Whether or not males  
526 injected with PFFs show similar changes in beta activity is an intriguing question, although  
527 given the prominence of olfactory dysfunction in male mice following PFF seeding  
528 (Johnson et al., 2020), it is likely. Further studies that address the possible influence of  
529 biological sex and on olfactory pathophysiology in the context of  $\alpha$ -Syn pathology are  
530 greatly needed.

531

532 *Some brain networks may be more vulnerable to the influence of  $\alpha$ -Syn PFF injections*  
533 *than others.*

534 The greatest effect of  $\alpha$ -Syn PFF injection on neural activity was in the OB. Despite  
535 pathogenic propagation of  $\alpha$ -Syn from the seeded structure (the OB) into a  
536 monosynaptically interconnected structure (the PCX), these structures (*i.e.*, their  
537 networks) were not equally affected. For instance, a striking effect in PFF seeded mice  
538 was an elevation in odor-evoked beta power (**Fig. 7 & 8**). This was observed only in the  
539 OB – suggesting that the OB is either directly impacted by  $\alpha$ -Syn pathology, or, that the  
540 PCX, which is known to innervate the OB and influence local inhibition, is impacted and  
541 this results in elevated beta power during odor inhalation. We propose the latter model is  
542 at play. This is based upon the known nature of beta activity to be  
543 originating/communicating between brain regions and also the notably low levels of  
544 Pser129 in the OB compared to the PCX. Regardless of mechanism, the results of the  
545 odor-evoked analyses highlight that the impact of  $\alpha$ -Syn aggregates may be region  
546 specific.

547 In our model,  $\alpha$ -Syn aggregates are present within several processing stages of  
548 the olfactory system (OB, AON, and PCX). Therefore, we cannot determine with certainty  
549 in which neuronal populations (single or multiple) that the  $\alpha$ -Syn aggregates influence  
550 neural activity, which ultimately give rise to the altered LFPs we detect.

551  
552 *The influence of  $\alpha$ -Syn PFF injection on oscillations is not directly related to levels of*  
553 *pSer129.*

554 The altered odor-evoked beta power in PFF injected mice (**Fig. 7 & 8**) was not  
555 correlated with levels of pSer129 pathology (**Fig. 9**). The elevations in beta power in the  
556 OB during odor were stable regardless of delay post seeding (**Fig. 7 & 8**) which had no  
557 impact on pSer129 levels in the OB (**Fig. 4C**).

558 Cell culture and slice physiology studies demonstrated that pathological  $\alpha$ -Syn  
559 perturbs normal synaptic function (Volpicelli-Daley et al., 2011; Wu et al., 2019), for  
560 instance, by oligomeric  $\alpha$ -Syn's actions upon glutamatergic receptors (Durante et al.,  
561 2019). Further, brain-surface electroencephalography from transgenic mice  
562 overexpressing human  $\alpha$ -synuclein, throughout the brain, uncovered aberrant activity,  
563 including epileptiform events (Morris et al., 2015). Our *in vivo* results suggest that  
564 elevations in pathological  $\alpha$ -Syn, up to a particular level, may be sufficient to entail  
565 changes in synaptic coupling or perhaps efficacy which may result in the aberrant LFP  
566 activity. While we do not elucidate the precise cellular mechanism whereby  $\alpha$ -Syn seeding  
567 perturbed neural activity, our correlation results do indicate that function is not strongly  
568 correlated with pathogenic  $\alpha$ -Syn levels at least at the level of the local networks (*viz.*,  
569 detectable with LFPs). This outcome points towards the likely influential role of other  
570 pathologies related to  $\alpha$ -Syn aggregates in shaping neural dynamics in the context of PD.  
571 For instance,  $\alpha$ -Syn aggregates accumulate in axons where they likely cause  
572 degeneration of the axons as well as dendrites (Volpicelli-Daley et al., 2011). Thus, it is  
573 possible that the influence of  $\alpha$ -Syn aggregates on neural activity would be more directly  
574 correlated with changes in activity as the aggregates mature.

575

576 *Conclusions.*

577 Our results extend important mechanistic work performed in cell culture and in brain  
578 slices indicating that  $\alpha$ -Syn aggregates can perturb synaptic activity. We used awake  
579 mice and studied how progressive changes in  $\alpha$ -Syn aggregate pathology affect the  
580 olfactory system at the network level. We found a change in neural activity that was  
581 region-specific, but did not directly correlate to the local degree of  $\alpha$ -Syn aggregate  
582 pathology. Future work to assess levels of other pathologies along with simultaneous  
583 neural recordings will be informative, as will be work utilizing methods allowing for  
584 monitoring the activity of select cell populations to understand the cell types specifically  
585 vulnerable to the effects of synucleinopathy.

586

587

588

589

590

591

592

593

594

595

596

597

598

599

600

601

602

603 **Acknowledgements:** Research reported in this publication was supported by the  
604 National Institute on Deafness and Other Communication Disorders of the National  
605 Institutes of Health under Award Numbers R01DC016519 (D.W. and P.B.)  
606 and R01DC014443 (D.W.). The content is solely the responsibility of the authors and  
607 does not necessarily represent the official views of the National Institutes of Health. We  
608 acknowledge the Van Andel Institute and many individuals and corporations that  
609 financially support research into neurodegenerative disease at Van Andel Institute. We  
610 also thank the Udall Center for Parkinson's Research at the University of Pennsylvania  
611 for generously providing  $\alpha$ -Syn PFFs and Karen Kelley at the University of Florida  
612 Interdisciplinary Center for Biotechnology Research for expert advice and training in  
613 electron microscopy.

614

615 **Competing interests:** P.B. has received commercial support as a consultant from Axial  
616 Biotherapeutics, CuraSen, Fujifilm-Cellular Dynamics International, Idorsia, IOS Press  
617 Partners, LifeSci Capital LLC, Lundbeck A/S and Living Cell Technologies LTD. He has  
618 received commercial support for grants/research from Lundbeck A/S and Roche. He  
619 has ownership interests in Acousort AB and Axial Biotherapeutics and is on the steering  
620 committee of the NILO-PD trial. The authors declare no additional competing financial  
621 interests.

622

623 **Author contributions:** Investigation (A.K., E.R., J.P-B, H.S., M.C.), Formal analyses  
624 (A.K., E.R., T.S.), Validation (A.K., T.S., D.W.), Methodology and Resources (J.A.S.,  
625 K.C.L, and D.W.), Writing-Original draft (A.K.), Review and Editing (A.K., J.A.S., P.B.,  
626 D.W.), Conceptualization, Supervision, and Funding acquisition (P.B. and D.W.)

627

628

629

630



631 **References**

- 632 Bauer, M., Oostenveld, R., Peeters, M., Fries, P., 2006. Tactile spatial attention  
633 enhances gamma-band activity in somatosensory cortex and reduces low-  
634 frequency activity in parieto-occipital areas. *J. Neurosci.* 26, 490–501.  
635 <https://doi.org/10.1523/JNEUROSCI.5228-04.2006>
- 636 Braak, H., Ghebremedhin, E., Rüb, U., Bratzke, H., Tredici, K., 2004. Stages in the  
637 development of Parkinson's disease-related pathology. *Cell Tissue Res* 318, 121–  
638 134. <https://doi.org/10.1007/s00441-004-0956-9>
- 639 Braak, H., Rüb, U., Gai, W.P., Del Tredici, K., 2003a. Idiopathic Parkinson's disease:  
640 Possible routes by which vulnerable neuronal types may be subject to  
641 neuroinvasion by an unknown pathogen. *J. Neural Transm.* 110, 517–536.  
642 <https://doi.org/10.1007/s00702-002-0808-2>
- 643 Braak, H., Tredici, K., Rüb, U., Vos, R.A.I., Jansen Steur, E.N.H., Braak, E., 2003b.  
644 Staging of brain pathology related to sporadic Parkinson's disease. *Neurobiol Aging*  
645 24, 197–211. [https://doi.org/10.1016/S0197-4580\(02\)00065-9](https://doi.org/10.1016/S0197-4580(02)00065-9)
- 646 Brown, P., 2006. Bad oscillations in Parkinson's disease, in: *Journal of Neural*  
647 *Transmission, Supplement*. Springer, Vienna , pp. 27–30.  
648 [https://doi.org/10.1007/978-3-211-45295-0\\_6](https://doi.org/10.1007/978-3-211-45295-0_6)
- 649 Brown, P., Oliviero, A., Mazzone, P., Insola, A., Tonali, P., Di Lazzaro, V., 2001.  
650 Dopamine Dependency of Oscillations between Subthalamic Nucleus and Pallidum  
651 in Parkinson's Disease. *J. Neurosci.* 21, 1033–1038.  
652 <https://doi.org/10.1523/JNEUROSCI.21-03-01033.2001>
- 653 Brown, P., Williams, D., 2005. Basal ganglia local field potential activity: Character and  
654 functional significance in the human. *Clin. Neurophysiol.*  
655 <https://doi.org/10.1016/j.clinph.2005.05.009>
- 656 Burciu, R.G., Vaillancourt, D.E., 2018. Imaging of Motor Cortex Physiology in  
657 Parkinson's Disease. *Mov. Disord.* 33, 1688–1699. <https://doi.org/10.1002/mds.102>
- 658 Burré, J., 2015. The synaptic function of  $\alpha$ -synuclein. *J. Parkinsons. Dis.*

- 659 <https://doi.org/10.3233/JPD-150642>
- 660 Burré, J., Sharma, M., Tsetsenis, T., Buchman, V., Etherton, M.R., Südhof, T.C., 2010.  
661  $\alpha$ -Synuclein promotes SNARE-complex assembly in vivo and in vitro. *Science* (80-  
662 ). 329, 1663–1667. <https://doi.org/10.1126/science.1195227>
- 663 Buzsáki, G., Anastassiou, C.A., Koch, C., 2012. The origin of extracellular fields and  
664 currents — EEG, ECoG, LFP and spikes. *Nat Rev Neurosci* 13, 407–420.  
665 [https://doi.org/http://www.nature.com/nrn/journal/v13/n6/supinfo/nrn3241\\_S1.html](https://doi.org/http://www.nature.com/nrn/journal/v13/n6/supinfo/nrn3241_S1.html)
- 666 Chandra, S., Fornai, F., Kwon, H.B., Yazdani, U., Atasoy, D., Liu, X., Hammer, R.E.,  
667 Battaglia, G., German, D.C., Castillo, P.E., Südhof, T.C., 2004. Double-knockout  
668 mice for  $\alpha$ - and  $\beta$ -synucleins: Effect on synaptic functions. *Proc. Natl. Acad. Sci. U.*  
669 *S. A.* 101, 14966–14971. <https://doi.org/10.1073/pnas.0406283101>
- 670 De Hemptinne, C., Swann, N.C., Ostrem, J.L., Ryapolova-Webb, E.S., San Luciano, M.,  
671 Galifianakis, N.B., Starr, P.A., 2015. Therapeutic deep brain stimulation reduces  
672 cortical phase-amplitude coupling in Parkinson’s disease. *Nat. Neurosci.* 18, 779–  
673 786. <https://doi.org/10.1038/nn.3997>
- 674 Doty, R.L., 2017. Olfactory dysfunction in neurodegenerative diseases: is there a  
675 common pathological substrate? *Lancet Neurol.* 16, 478–488.  
676 [https://doi.org/https://doi.org/10.1016/S1474-4422\(17\)30123-0](https://doi.org/https://doi.org/10.1016/S1474-4422(17)30123-0)
- 677 Doty, R.L., 2012. Olfactory dysfunction in Parkinson disease. *Nat. Rev. Neurol.* 8, 329–  
678 339. <https://doi.org/10.1038/nrneurol.2012.80>
- 679 Doty, R.L., Cameron, E.L., 2009. Sex differences and reproductive hormone influences  
680 on human odor perception. *Physiol. Behav.* 97, 213–28.  
681 <https://doi.org/10.1016/j.physbeh.2009.02.032>
- 682 Doty, R.L., Ferguson-Segall, M., Lucki, I., Kreider, M., 1988. Effects of intrabulbar  
683 injections of 6-hydroxydopamine on ethyl acetate odor detection in castrate and  
684 non-castrate male rats. *Brain Res* 444, 95–103.
- 685 Doucette, W., Milder, J., Restrepo, D., 2007. Adrenergic modulation of olfactory bulb  
686 circuitry affects odor discrimination. *Learn Mem* 14, 539–547.

- 687 <https://doi.org/14/8/539> [pii]10.1101/lm.606407
- 688 Durante, V., de Iure, A., Loffredo, V., Vaikath, N., De Risi, M., Paciotti, S., Quiroga-  
689 Varela, A., Chiasserini, D., Mellone, M., Mazzocchetti, P., Calabrese, V.,  
690 Campanelli, F., Mechelli, A., Di Filippo, M., Ghiglieri, V., Picconi, B., El-Agnaf, O.M.,  
691 De Leonibus, E., Gardoni, F., Tozzi, A., Calabresi, P., 2019. Alpha-synuclein  
692 targets GluN2A NMDA receptor subunit causing striatal synaptic dysfunction and  
693 visuospatial memory alteration. *Brain* 142, 1365–1385.  
694 <https://doi.org/10.1093/brain/awz065>
- 695 Eisinger, R.S., Cagle, J., Opri, E., Alcantara, J., Cernera, S., Foote, K.D., Okun, M.S.,  
696 Gunduz, A., 2020. Parkinsonian beta dynamics during rest and movement in the  
697 dorsal pallidum and subthalamic nucleus. *J. Neurosci.* 40, 2859–2867.  
698 <https://doi.org/10.1523/JNEUROSCI.2113-19.2020>
- 699 Feingold, J., Gibson, D.J., DePasquale, B., Graybiel, A.M., 2015. Bursts of beta  
700 oscillation differentiate postperformance activity in the striatum and motor cortex of  
701 monkeys performing movement tasks. *Proc. Natl. Acad. Sci.* 112, 13687 LP –  
702 13692. <https://doi.org/10.1073/pnas.1517629112>
- 703 Fujiwara, H., Hasegawa, M., Dohmae, N., Kawashima, A., Masliah, E., Goldberg, M.S.,  
704 Shen, J., Takio, K., Iwatsubo, T., 2002.  $\alpha$ -Synuclein is phosphorylated in  
705 synucleinopathy lesions. *Nat. Cell Biol.* 4, 160–164. <https://doi.org/10.1038/ncb748>
- 706 Gadziola, M.A., Tylicki, K.A., Christian, D.L., Wesson, D.W., 2015. The Olfactory  
707 Tubercle Encodes Odor Valence in Behaving Mice. *J. Neurosci.* 35, 4515–4527.  
708 <https://doi.org/10.1523/JNEUROSCI.4750-14.2015>
- 709 Gervais, R., Buonviso, N., Martin, C., Ravel, N., 2007. What do electrophysiological  
710 studies tell us about processing at the olfactory bulb level? *J. Physiol. Paris* 101,  
711 40–45. <https://doi.org/10.1016/j.jphysparis.2007.10.006>
- 712 Giannicola, G., Marceglia, S., Rossi, L., Mrakic-Spota, S., Rampini, P., Tamma, F.,  
713 Cogiamanian, F., Barbieri, S., Priori, A., 2010. The effects of levodopa and ongoing  
714 deep brain stimulation on subthalamic beta oscillations in Parkinson's disease. *Exp.*

- 715           Neurol. 226, 120–127. <https://doi.org/10.1016/j.expneurol.2010.08.011>
- 716   Goedert, M., 2001. Alpha-synuclein and neurodegenerative diseases. *Nat Rev Neurosci*  
717       2. <https://doi.org/10.1038/35081564>
- 718   Gottfried, J.A., 2010. Central mechanisms of odour object perception. *Nat Rev Neurosci*  
719       11, 628–641.  
720       [https://doi.org/http://www.nature.com/nrn/journal/v11/n9/supinfo/nrn2883\\_S1.html](https://doi.org/http://www.nature.com/nrn/journal/v11/n9/supinfo/nrn2883_S1.html)
- 721   Haegens, S., Zion Golumbic, E., 2018. Rhythmic facilitation of sensory processing: A  
722       critical review. *Neurosci. Biobehav. Rev.* 86, 150–165.  
723       <https://doi.org/https://doi.org/10.1016/j.neubiorev.2017.12.002>
- 724   Hammond, C., Bergman, H., Brown, P., 2007. Pathological synchronization in  
725       Parkinson's disease: networks, models and treatments. *Trends Neurosci.*  
726       <https://doi.org/10.1016/j.tins.2007.05.004>
- 727   Johnson, M.E., Bergkvist, L., Mercado, G., Stetzik, L., Meyerdirk, L., Wolfrum, E.,  
728       Madaj, Z., Brundin, P., Wesson, D., 2020. Deficits in olfactory sensitivity in a mouse  
729       model of Parkinson ' s disease revealed by plethysmography of odor-evoked  
730       sniffing. *Sci. Rep.* 10, 1–27. <https://doi.org/10.1101/2020.02.27.968545>
- 731   Kay, L.M., Beshel, J., 2010. A beta oscillation network in the rat olfactory system during  
732       a 2-alternative choice odor discrimination task. *J. Neurophysiol.* 104, 829–839.
- 733   Kay, L.M., Beshel, J., Brea, J., Martin, C., Rojas-Líbano, D., Kopell, N., 2009. Olfactory  
734       oscillations: the what, how and what for. *Trends Neurosci.* 32, 207–214.
- 735   Kay, L.M., Stopfer, M., 2006. Information processing in the olfactory systems of insects  
736       and vertebrates. *Semin. Cell Dev. Biol.* 17, 433–442.  
737       <https://doi.org/http://dx.doi.org/10.1016/j.semcdb.2006.04.012>
- 738   Komisaruk, B.R., 1970. Synchrony between limbic system theta activity and rhythmical  
739       behavior in rats. *J Comp Physiol Psychol* 70, 482–492.
- 740   Kopell, N., Ermentrout, G.B., Whittington, M.A., Traub, R.D., 2000. Gamma rhythms and  
741       beta rhythms have different synchronization properties. *Proc. Natl. Acad. Sci. U. S.*

- 742 A. 97, 1867–1872.
- 743 Kühn, A.A., Kupsch, A., Schneider, G.H., Brown, P., 2006. Reduction in subthalamic 8-  
744 35 Hz oscillatory activity correlates with clinical improvement in Parkinson's  
745 disease. *Eur. J. Neurosci.* 23, 1956–1960. [https://doi.org/10.1111/j.1460-](https://doi.org/10.1111/j.1460-9568.2006.04717.x)  
746 [9568.2006.04717.x](https://doi.org/10.1111/j.1460-9568.2006.04717.x)
- 747 Lee, E.Y., Eslinger, P.J., Du, G., Kong, L., Lewis, M.M., Huang, X., 2014. Olfactory-  
748 related cortical atrophy is associated with olfactory dysfunction in Parkinson's  
749 disease. *Mov. Disord.* 29, 1205–1208. <https://doi.org/10.1002/mds.25829>
- 750 Little, S., Brown, P., 2014. The functional role of beta oscillations in Parkinson's  
751 disease. *Park. Relat. Disord.* 20, S44–S48. [https://doi.org/10.1016/S1353-](https://doi.org/10.1016/S1353-8020(13)70013-0)  
752 [8020\(13\)70013-0](https://doi.org/10.1016/S1353-8020(13)70013-0)
- 753 Lowry, C.A., Kay, L.M., 2007. Chemical factors determine olfactory system beta  
754 oscillations in waking rats. *J Neurophysiol* 98, 394–404. <https://doi.org/00124.2007>  
755 [\[pii\]10.1152/jn.00124.2007](https://doi.org/00124.2007)
- 756 Luk, K., Kehm, V., Zhang, B., O'Brien, P., Trojanowski, J., Lee, V., 2012. Intracerebral  
757 inoculation of pathological  $\alpha$ -synuclein initiates a rapidly progressive  
758 neurodegenerative  $\alpha$ -synucleinopathy in mice. *J Exp Med* 209.  
759 <https://doi.org/10.1084/jem.20112457>
- 760 Luk, K.C., Lee, V.M.-Y., 2014. Modeling Lewy pathology propagation in Parkinson's  
761 disease. *Parkinsonism Relat. Disord.* 20, S85–S87. [https://doi.org/10.1016/S1353-](https://doi.org/10.1016/S1353-8020(13)70022-1)  
762 [8020\(13\)70022-1](https://doi.org/10.1016/S1353-8020(13)70022-1)
- 763 Luk, K.C., Song, C., O'Brien, P., Stieber, A., Branch, J.R., Brunden, K.R., Trojanowski,  
764 J.Q., Lee, V.M.Y., 2009. Exogenous  $\alpha$ -synuclein fibrils seed the formation of Lewy  
765 body-like intracellular inclusions in cultured cells. *Proc. Natl. Acad. Sci. U. S. A.*  
766 106, 20051–20056. <https://doi.org/10.1073/pnas.0908005106>
- 767 Mahlknecht, P., Seppi, K., Poewe, W., 2015. The concept of prodromal Parkinson's  
768 disease. *J. Parkinsons. Dis.* <https://doi.org/10.3233/JPD-150685>
- 769 Martin, C., Beshel, J., Kay, L.M., 2007. An olfacto-hippocampal network is dynamically

- 770 involved in odor-discrimination learning. *J Neurophysiol* 98, 2196–2205.
- 771 Mason, D.M., Nouraei, N., Pant, D.B., Miner, K.M., Hutchison, D.F., Luk, K.C., Stolz,  
772 J.F., Leak, R.K., 2016. Transmission of  $\alpha$ -synucleinopathy from olfactory structures  
773 deep into the temporal lobe. *Mol. Neurodegener.* 11, 49.  
774 <https://doi.org/10.1186/s13024-016-0113-4>
- 775 McCarthy, M.M., Moore-Kochlacs, C., Gu, X., Boyden, E.S., Han, X., Kopell, N., 2011.  
776 Striatal origin of the pathologic beta oscillations in Parkinson's disease. *Proc. Natl.*  
777 *Acad. Sci. U. S. A.* 108, 11620–11625. <https://doi.org/10.1073/pnas.1107748108>
- 778 Mezas, C., Rey, N., Brundin, P., Raj, A., 2020. Neural connectivity predicts spreading  
779 of alpha-synuclein pathology in fibril-injected mouse models: Involvement of  
780 retrograde and anterograde axonal propagation. *Neurobiol. Dis.* 134, 104623.  
781 <https://doi.org/10.1016/j.nbd.2019.104623>
- 782 Mitzdorf, U., 1985. Current source-density method and application in cat cerebral  
783 cortex: investigation of evoked potentials and EEG phenomena. *Physiol. Rev.* 65,  
784 37–100.
- 785 Moran, A., Bergman, H., Israel, Z., Bar-Gad, I., 2008. Subthalamic nucleus functional  
786 organization revealed by parkinsonian neuronal oscillations and synchrony. *Brain*  
787 131, 3395–409. <https://doi.org/10.1093/brain/awn270>
- 788 Morris, M., Sanchez, P.E., Verret, L., Beagle, A.J., Guo, W., Dubal, D., Ranasinghe,  
789 K.G., Koyama, A., Ho, K., Yu, G.Q., Vossel, K.A., Mucke, L., 2015. Network  
790 dysfunction in  $\alpha$ -synuclein transgenic mice and human Lewy body dementia. *Ann.*  
791 *Clin. Transl. Neurol.* 2, 1012–1028. <https://doi.org/10.1002/acn3.257>
- 792 Neville, K.R., Haberly, L.B., 2003. Beta and gamma oscillations in the olfactory system  
793 of the urethane-anesthetized rat. *J Neurophysiol* 90, 3921–3930.
- 794 Nusser, Z., Kay, L.M., Laurent, G., Homanics, G.E., Mody, I., 2001. Disruption of  
795 GABA(A) receptors on GABAergic interneurons leads to increased oscillatory  
796 power in the olfactory bulb network. *J Neurophysiol* 86, 2823–2833.
- 797 Paxinos, G., Franklin, K., 2000. *The Mouse Brain in Stereotaxic Coordinates*, 2nd ed.

- 798 Academic Press, San Diego.
- 799 Peelaerts, W., Bousset, L., Baekelandt, V., Melki, R., 2018.  $\alpha$ -Synuclein strains and  
800 seeding in Parkinson's disease, incidental Lewy body disease, dementia with Lewy  
801 bodies and multiple system atrophy: similarities and differences. *Cell Tissue Res.*  
802 <https://doi.org/10.1007/s00441-018-2839-5>
- 803 Phillips, P.D., Vallowe, H.H., 1975. Cyclic fluctuations in odor detection by female rats  
804 and the temporal influences of exogenous steroids on ovariectomized rats. *Proc.*  
805 *Pennsylvania Acad. Sci.* <https://doi.org/10.2307/44110934>
- 806 Polinski, N.K., Volpicelli-Daley, L.A., Sortwell, C.E., Luk, K.C., Cremades, N., Gottler,  
807 L.M., Froula, J., Duffy, M.F., Lee, V.M., Martinez, T.N., Dave, K.D., 2018. Best  
808 Practices for Generating and Using Alpha-Synuclein Pre-Formed Fibrils to Model  
809 Parkinson's Disease in Rodents. *J. Parkinsons. Dis.*
- 810 Rall, W., Shepherd, G.M., 1968. Theoretical reconstruction of field potentials and  
811 dendrodendritic synaptic interactions in olfactory bulb. *J Neurophysiol* 31, 884–915.
- 812 Rey, N.L., George, S., Steiner, J.A., Madaj, Z., Luk, K.C., Trojanowski, J.Q., Lee, V.M.-  
813 Y., Brundin, P., 2018a. Spread of aggregates after olfactory bulb injection of  $\alpha$ -  
814 synuclein fibrils is associated with early neuronal loss and is reduced long term.  
815 *Acta Neuropathol.* 135, 65–83. <https://doi.org/10.1007/s00401-017-1792-9>
- 816 Rey, N.L., Petit, G.H., Bousset, L., Melki, R., Brundin, P., 2013. Transfer of human  $\alpha$ -  
817 synuclein from the olfactory bulb to interconnected brain regions in mice. *Acta*  
818 *Neuropathol.* 126, 555–573. <https://doi.org/10.1007/s00401-013-1160-3>
- 819 Rey, N.L., Steiner, J.A., Maroof, N., Luk, K.C., Madaj, Z., Trojanowski, J.Q., Lee, V.M.-  
820 Y., Brundin, P., 2016. Widespread transneuronal propagation of  $\alpha$ -synucleinopathy  
821 triggered in olfactory bulb mimics prodromal Parkinson's disease. *J. Exp. Med.* 213,  
822 1759–78. <https://doi.org/10.1084/jem.20160368>
- 823 Rey, N.L., Wesson, D.W., Brundin, P., 2018b. The olfactory bulb as the entry site for  
824 prion-like propagation in neurodegenerative diseases. *Neurobiol. Dis.* 109, 226–  
825 248. <https://doi.org/http://dx.doi.org/10.1016/j.nbd.2016.12.013>



- 826 Ross, G.W., Petrovitch, H., Abbott, R.D., Tanner, C.M., Popper, J., Masaki, K., Launer,  
827 L., White, L.R., 2008. Association of olfactory dysfunction with risk for future  
828 Parkinson's disease. *Ann. Neurol.* 63, 167–173. <https://doi.org/10.1002/ana.21291>
- 829 Schindelin, J., Arganda-Carreras, I., Frise, E., Kaynig, V., Longair, M., Pietzsch, T.,  
830 Preibisch, S., Rueden, C., Saalfeld, S., Schmid, B., Tinevez, J.Y., White, D.J.,  
831 Hartenstein, V., Eliceiri, K., Tomancak, P., Cardona, A., 2012. Fiji: An open-source  
832 platform for biological-image analysis. *Nat. Methods.*  
833 <https://doi.org/10.1038/nmeth.2019>
- 834 Schoppa, N.E., Urban, N.N., 2003. Dendritic processing within olfactory bulb circuits.  
835 *Trends Neurosci* 26, 501–506.
- 836 Scott, J.W., McBride, R.L., Schneider, S.P., 1980. The organization of projections from  
837 the olfactory bulb to the piriform cortex and olfactory tubercle in the rat. *J Comp*  
838 *Neurol* 194, 519–534.
- 839 Shepherd, G.M., 1972. Synaptic organization of the mammalian olfactory bulb. *Physiol.*  
840 *Rev.* <https://doi.org/10.1152/physrev.1972.52.4.864>
- 841 Sorwell, K.G., Wesson, D.W., Baum, M.J., 2008. Sexually dimorphic enhancement by  
842 estradiol of male urinary odor detection thresholds in mice. *Behav. Neurosci.* 122,  
843 788–793. <https://doi.org/2008-09788-007> [pii] 10.1037/0735-7044.122.4.788
- 844 Spillantini, M.G., Schmidt, M.L., Lee, V.M., Trojanowski, J.Q., Jakes, R., Goedert, M.,  
845 1997. Alpha-synuclein in Lewy bodies. *Nature* 388. <https://doi.org/10.1038/42166>
- 846 Spitzer, B., Haegens, S., 2017. Beyond the Status Quo: A Role for Beta Oscillations in  
847 Endogenous Content (Re)Activation. *eneuro* 4, ENEURO.0170-17.2017.  
848 <https://doi.org/10.1523/ENEURO.0170-17.2017>
- 849 Spitzer, B., Wacker, E., Blankenburg, F., 2010. Oscillatory correlates of vibrotactile  
850 frequency processing in human working memory. *J. Neurosci.* 30, 4496–4502.  
851 <https://doi.org/10.1523/JNEUROSCI.6041-09.2010>
- 852 van Ede, F., Jensen, O., Maris, E., 2010. Tactile expectation modulates pre-stimulus A-  
853 band oscillations in human sensorimotor cortex. *Neuroimage* 51, 867–876.

- 854 <https://doi.org/10.1016/j.neuroimage.2010.02.053>
- 855 Volpicelli-Daley, L.A., Luk, K.C., Lee, V.M.-Y., 2014. Addition of exogenous  $\alpha$ -synuclein  
856 preformed fibrils to primary neuronal cultures to seed recruitment of endogenous  $\alpha$ -  
857 synuclein to Lewy body and Lewy neurite-like aggregates. *Nat. Protoc.* 9, 2135.
- 858 Volpicelli-Daley, L.A., Luk, K.C., Patel, T.P., Tanik, S.A., Riddle, D.M., Stieber, A.,  
859 Meaney, D.F., Trojanowski, J.Q., Lee, V.M.-Y., 2011. Exogenous  $\alpha$ -synuclein fibrils  
860 induce Lewy body pathology leading to synaptic dysfunction and neuron death.  
861 *Neuron* 72, 57–71. <https://doi.org/10.1016/j.neuron.2011.08.033>
- 862 Wachowiak, M., Shipley, M.T., 2006. Coding and synaptic processing of sensory  
863 information in the glomerular layer of the olfactory bulb. *Semin Cell Dev Biol* 17,  
864 411–423.
- 865 Wattendorf, E., Welge-Lussen, A., Fiedler, K., Bilecen, D., Wolfensberger, M., Fuhr, P.,  
866 Hummel, T., Westermann, B., 2009. Olfactory Impairment Predicts Brain Atrophy in  
867 Parkinson's Disease. *J. Neurosci.* 29, 15410–15413.  
868 <https://doi.org/10.1523/jneurosci.1909-09.2009>
- 869 Wen, M.C., Xu, Z., Lu, Z., Chan, L.L., Tan, E.K., Tan, L.C.S., 2017. Microstructural  
870 network alterations of olfactory dysfunction in newly diagnosed Parkinson's  
871 disease. *Sci. Rep.* 7, 12559. <https://doi.org/10.1038/s41598-017-12947-7>
- 872 Wesson, D.W., Keller, M., Douhard, Q., Baum, M.J., Bakker, J., 2006. Enhanced urinary  
873 odor discrimination in female aromatase knockout (ArKO) mice. *Horm. Behav.* 49,  
874 580–586.
- 875 Wilson, D.A., 2001. Scopolamine enhances generalization between odor  
876 representations in rat olfactory cortex. *Learn Mem* 8, 279–285.
- 877 Wilson, D.A., Sullivan, R.M., 2011. Cortical processing of odor objects. *Neuron* 72, 506–  
878 519.
- 879 Wu, Q., Takano, H., Riddle, D.M., Trojanowski, J.Q., Coulter, D.A., Lee, V.M.-Y., 2019.  
880 Alpha-synuclein ( $\alpha$ Syn) preformed fibrils induce endogenous  $\alpha$ Syn aggregation,  
881 compromise synaptic activity and enhance synapse loss in cultured excitatory

882 hippocampal neurons. *J. Neurosci.* 0060–19.

883 <https://doi.org/10.1523/JNEUROSCI.0060-19.2019>

884 Wu, X., Yu, C., Fan, F., Zhang, K., Zhu, C., Wu, T., Li, K., Chan, P., 2011. Correlation  
885 between Progressive Changes in Piriform Cortex and Olfactory Performance in  
886 Early Parkinson's Disease. *Eur. Neurol.* 66, 98–105.

887 <https://doi.org/10.1159/000329371>

888

889

890

891

892

893

894

895

896

897

898

899

900

901

902

903

904

905

906

## 907 **Figures**

908

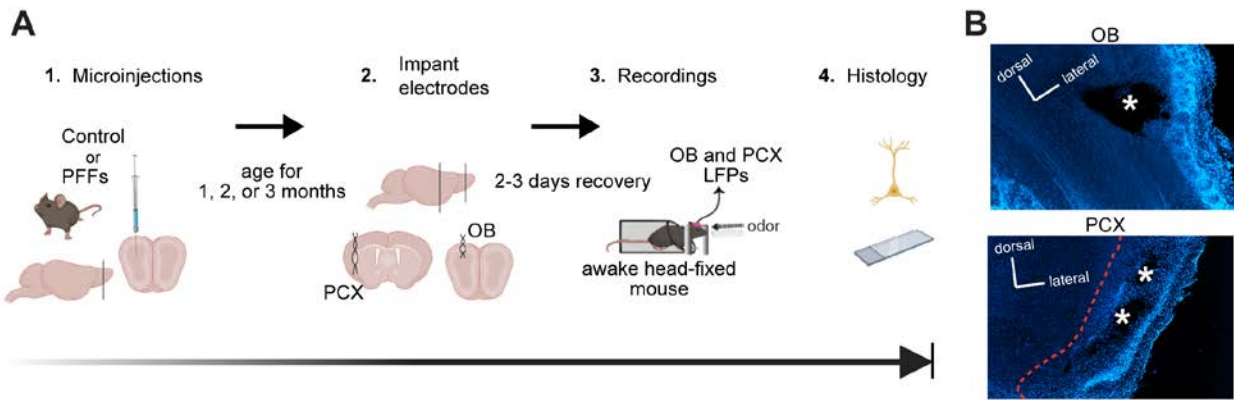

909

910 **Fig 1. Experimental design for  $\alpha$ -Syn seeding and subsequent multi-site LFP**  
911 **recordings in awake mice. A,** 2-3 months old C57BL/6J mice received unilateral OB  
912 injections of either  $\alpha$ -Syn PFFs or PBS and survived for 1, 2, or 3 months post injection.  
913 The mice were then surgically implanted ipsilaterally to the initial surgical site in the OB  
914 and PCX with twisted bipolar electrodes for LFP recordings. Following this, the mice were  
915 allowed 2-3 days to recover. Spontaneous and odor-evoked LFPs were recorded from  
916 awake mice while they were head fixed (to allow control for the positioning of the snout  
917 relative to the odor port) in the absence and presence of odors respectively, and then  
918 were perfused within 3 days for *post-mortem* histology. Image made in BioRender. **B,**  
919 Example localization of the electrode implants in the OB and PCX of a mouse injected  
920 with PBS using 10X magnification. \* = former sites of bipolar electrode tips.

921

922

923

924

925

926

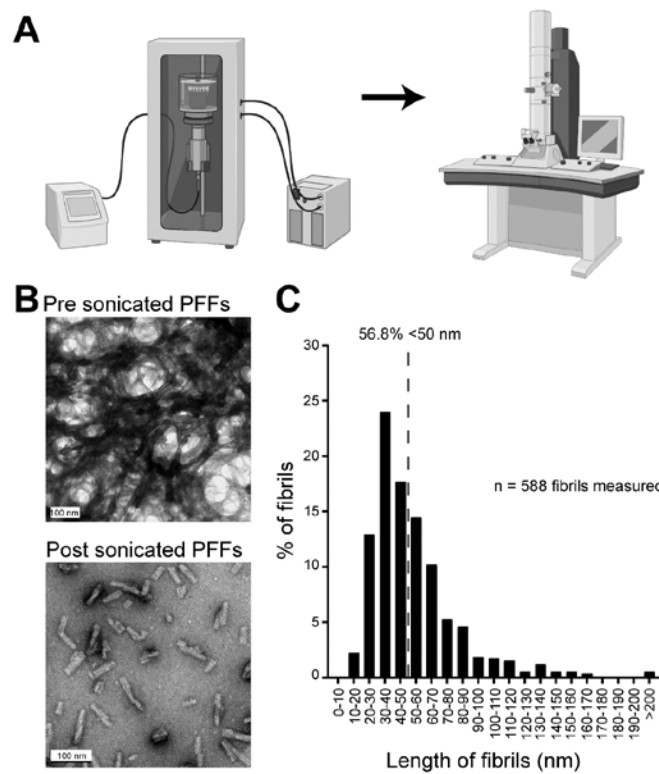

927

928 **Fig 2. Verification of PFF length prior to OB injections.** **A**, Experimental design,  
929 including sonication and electron microscopy, to optimize the length of the PFFs. Image  
930 made in BioRender. **B**, Transmission electron microscopy images of PFFs before and  
931 after sonication. To allow for visualization and quantification of sonicated individual fibrils,  
932 the sonicated sample was diluted prior to imaging. Scale bars represent 100 nm. **C**,  
933 Histogram of PFF length post sonication illustrating that >50% of the fibril population are  
934 <50 nm. Dashed line represents 50% of total population of PFFs quantified. Data from  
935 two separate sonication runs, 6-7 electron micrographs each.

936

937

938

939

940

941

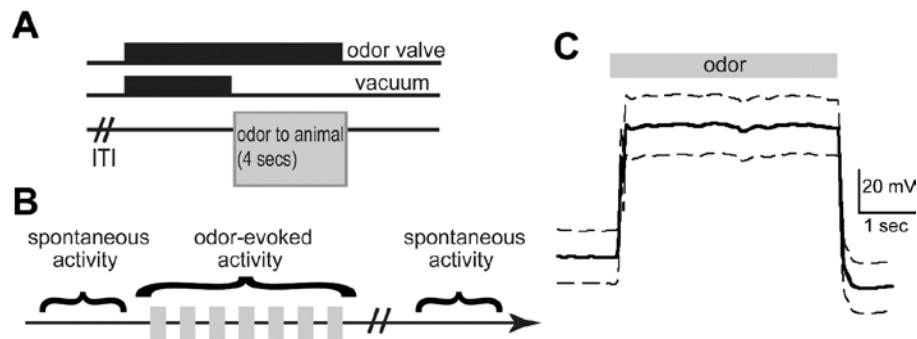

942

943 **Fig 3. Paradigm for recording spontaneous and odor-evoked LFPs from head-fixed**  
944 **awake mice. A,** After a variable inter-trial interval (ITI), the odor valves are turned on for  
945 8 secs and the vacuum for 4 secs. This allows the animal to be presented with an odor  
946 for 4 secs. **B,** Schematic showing the recording paradigm. An epoch of spontaneous LFP  
947 activity was recorded before and after odor presentation. During odor presentation, 7  
948 odors were presented in a pseudo-random order for 4-5 sessions, and their odor-evoked  
949 activity recorded. **C,** Average photoionization detector trace in response to 12  
950 presentations of 1 Torr isopentyl acetate, depicting the rapid temporal dynamics and  
951 stability of odor presentation (10 Hz, low pass filtered). Data are mean +/- SEM.

952

953

954

955

956

957

958

959

960

961

962

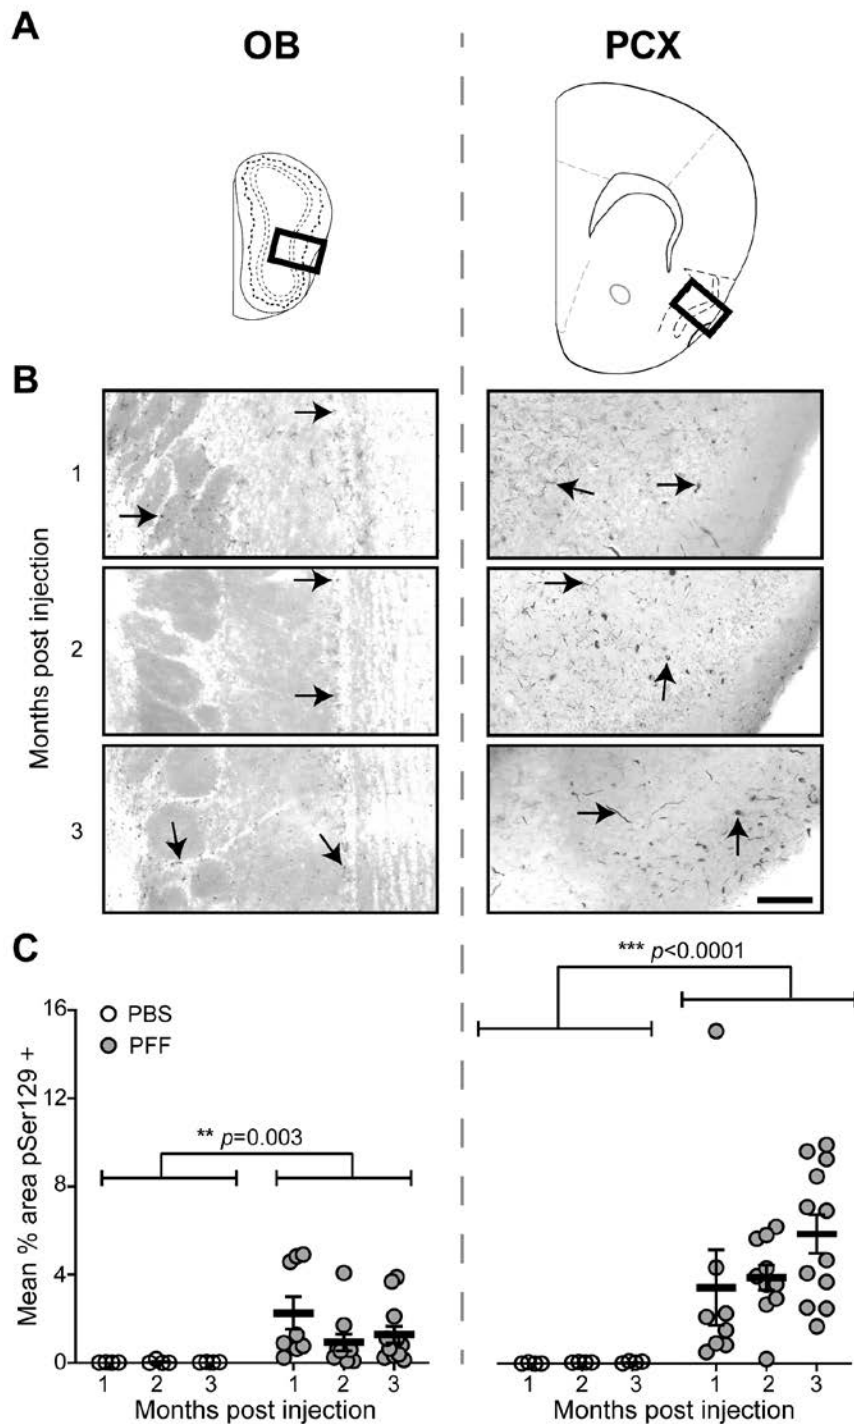

963

964 **Fig 4. PFFs injected in the OB induced an amplification and spread of pathology to**  
965 **interconnected regions, including the PCX.** Pser129 immunofluorescence was used  
966 as an assay to detect pathological  $\alpha$ -Syn. **A**, Coronal panel showing the regions (bold



967 boxes) used for quantifying Pser129 expression level in the OB and PCX. **B**,  
968 Representative images of Pser129 immunofluorescence staining of the OB and PCX of  
969 mice that survived for 1, 2, or 3 months post PFF seeding. Arrowheads in the OB and  
970 PCX panels indicate areas of neuritic pathology. The images were gray-scaled and  
971 inverted to show pathology more readily, for illustration purposes of this figure only. **C**,  
972 Quantification of mean % area in the OB and PCX, showing Pser129  
973 immunofluorescence in PFF and a subset of PBS injected mice that survived for 1 (PFF  
974  $n= 8$ , PBS  $n= 4$  ), 2 (PFF  $n= 10$ , PBS  $n= 4$ ), and 3 (PFF  $n= 12$ , PBS  $n= 4$ ) months post  
975 injection. Animals injected with PFFs had a significantly greater Pser129 immunopositive  
976 signal than the PBS injected animals, including in both the OB and PCX. Significant  
977 increase in mean % area Pser129 was observed in the PCX when compared to the OB.  
978 \*\*\* $p \leq 0.001$  ANOVA followed by Tukey's multiple comparison's test.

979

980

981

982

983

984

985

986

987

988

989

990

991

992

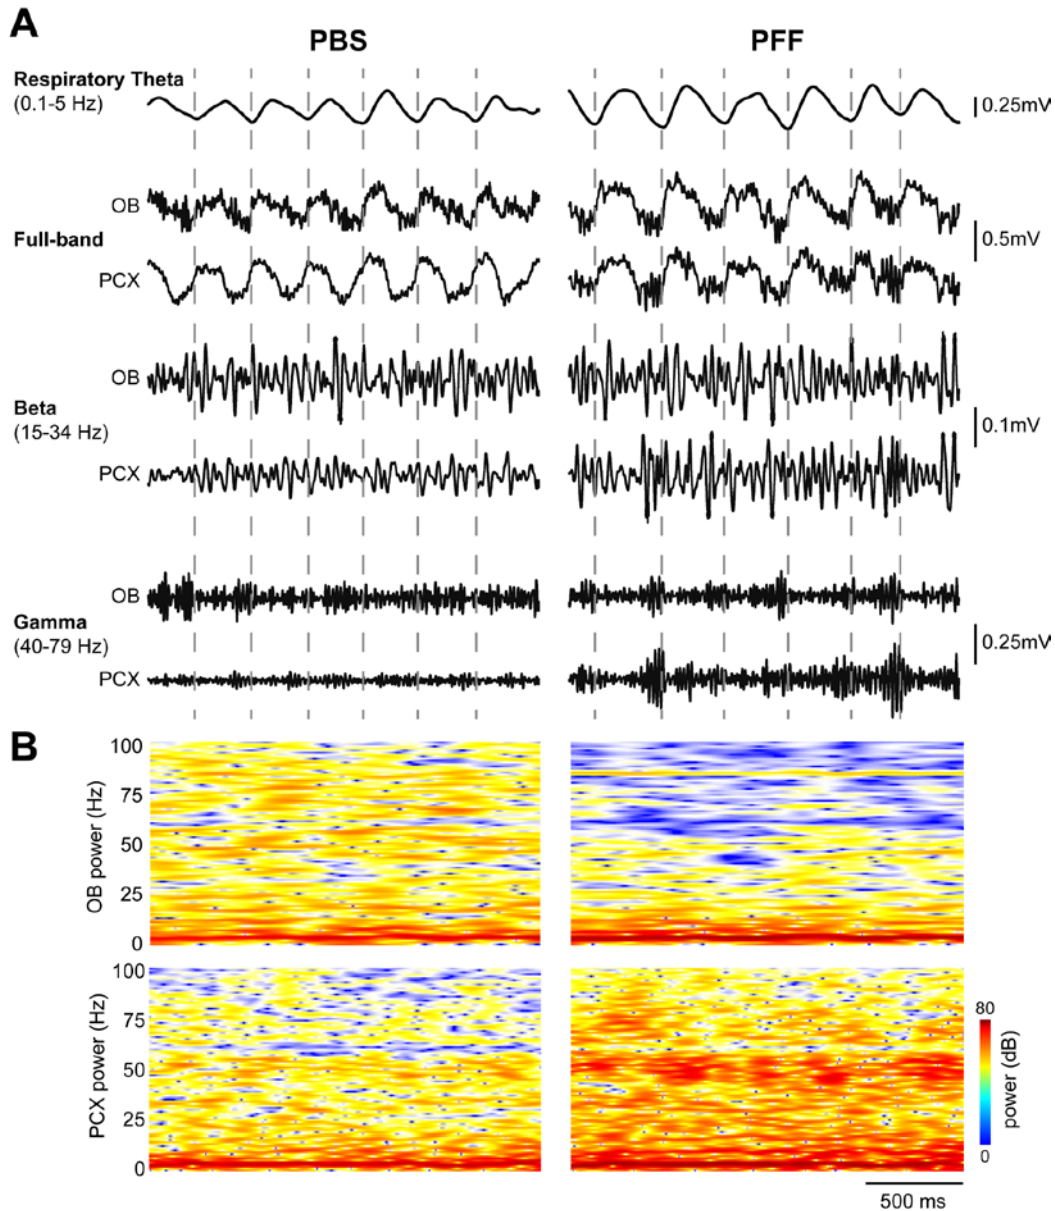

993

994 **Fig 5. Example spontaneous LFP activity.** **A**, Representative spontaneous LFP traces  
995 from two separate mice injected with either PBS (left) or PFF (right), 2 months prior to  
996 recording. Shown are full band traces from simultaneous OB and PCX recordings (0.1-  
997 100Hz) which were also filtered to separately display beta and gamma band activity as  
998 defined in the figure. Respiratory theta from the OB is also displayed along with dashed  
999 vertical lines indicating the timing of OB respiratory cycles for visual aid. **B**, 2-dimensional  
1000 histograms of the same spontaneous full band power spectrograms with power displayed  
1001 in dB to help illustrate the diversity of the full band data.

1002

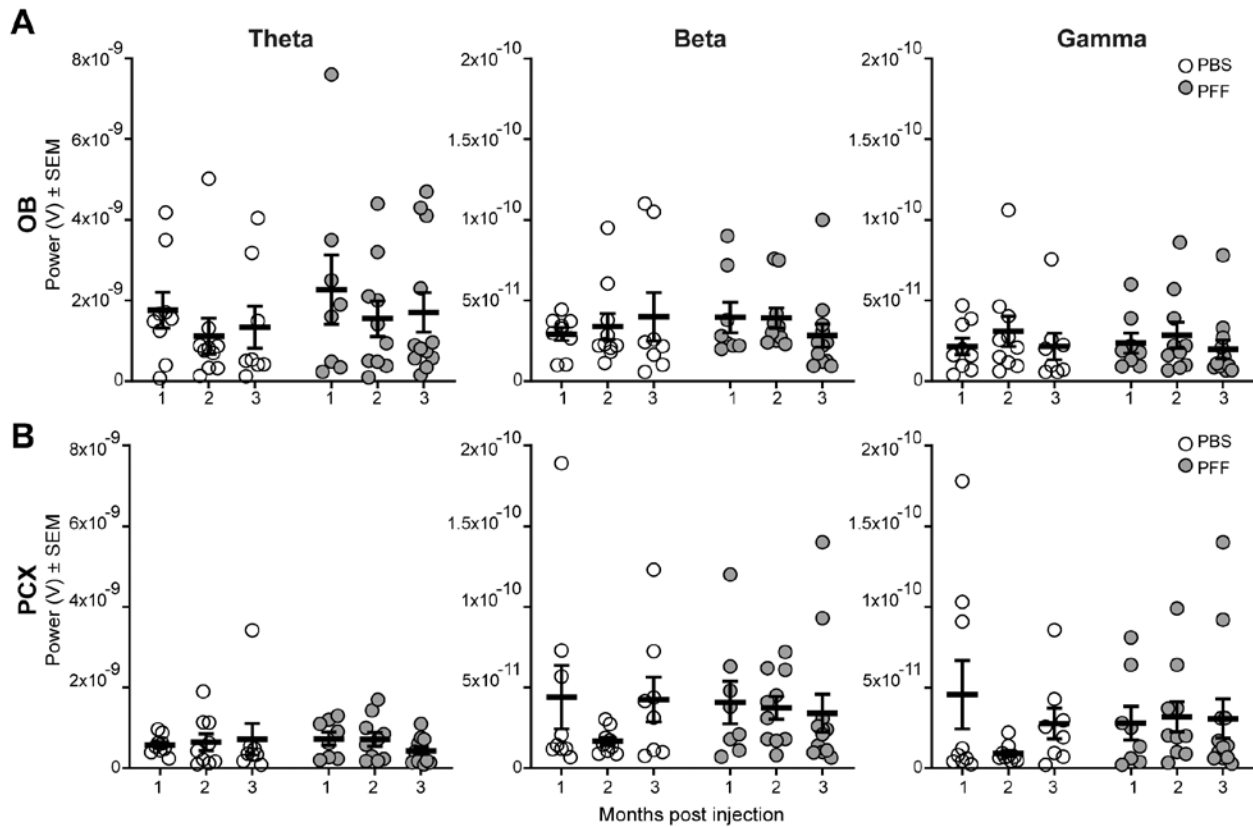

1003

1004 **Fig 6. No effect of PFF injection on spontaneous LFP powers in the OB or PCX.**  
1005 Spontaneous OB (A) and PCX LFP power (B), consisting of theta (1-10 Hz), beta (15-34  
1006 Hz), and gamma (40-75 Hz) spectral bands in either PFF seeded mice or PBS injected  
1007 mice that survived for 1 (PFF:  $n=8$ , PBS:  $n=9$ ), 2 (PFF:  $n=10$ , PBS:  $n=9$ ), or 3 (PFF:  
1008  $n=12$ , PBS:  $n=8$ ) months post injection. No treatment or age-post injection effect was  
1009 observed in either brain region.

1010

1011

1012

1013

1014

1015

1016

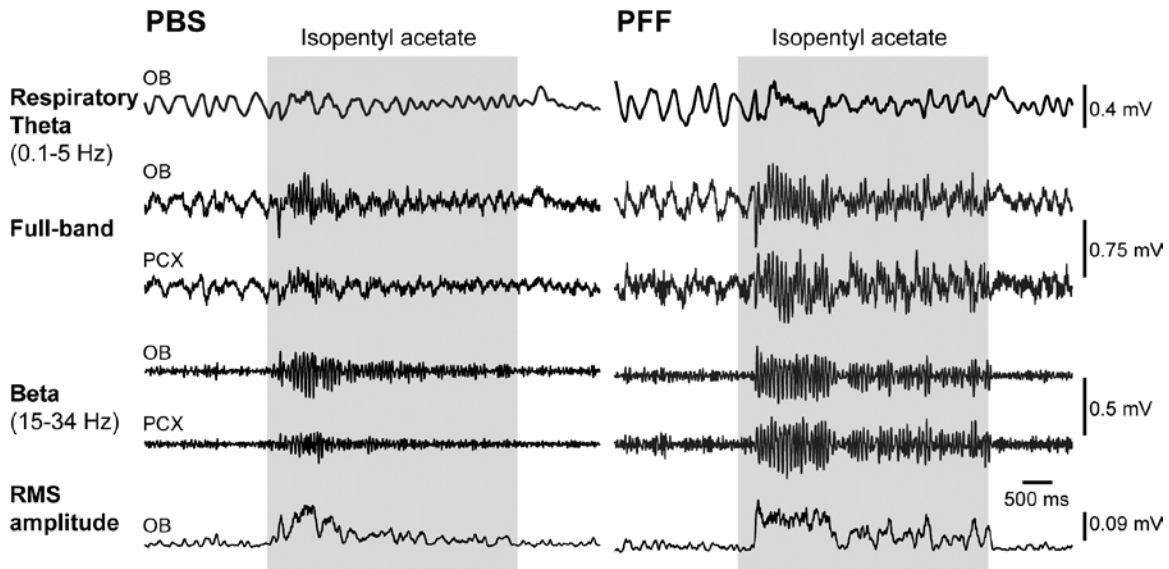

1017

1018 **Fig 7. OB PFF seeding entails heightened odor-evoked OB beta-band power.**

1019 Representative odor-evoked LFP traces from two separate mice injected with either PBS  
1020 (left) or PFF (right), 2 months prior to recording. Shown are full band traces from odor-  
1021 evoked OB and PCX recordings (0.1-100Hz) which were also filtered to separately display  
1022 beta band activity as defined in the figure. Respiratory theta from the OB is also displayed  
1023 as is the root mean square of the beta band activity to illustrate elevated power of beta  
1024 activity in the PFF injected versus PBS injected mouse. Gray shaded boxes indicate the  
1025 time of odor delivery.

1026

1027

1028

1029

1030

1031

1032

1033

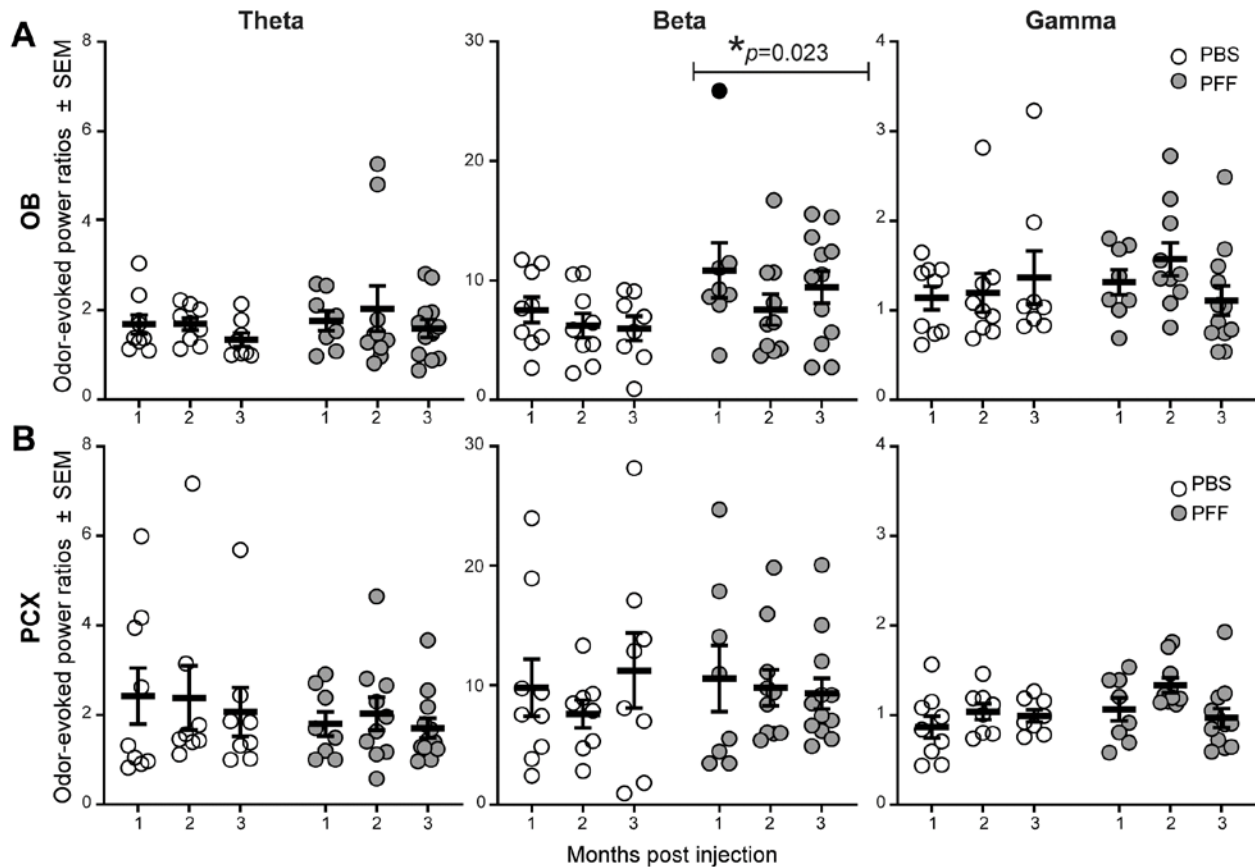

1034

1035 **Fig 8. Analyses of odor-evoked activity uncover PFF seeding induced aberrant OB**  
1036 **beta-band power during odor. A,B,** Odor-evoked OB and PCX LFP power, consisting  
1037 of theta (1-10 Hz), beta (15-34 Hz), and gamma (40-75 Hz) spectral bands in either PFF  
1038 seeded mice or PBS injected mice that survived 1 (PFF:  $n= 8$ , PBS:  $n= 9$ ), 2 (PFF:  $n= 10$   
1039 , PBS:  $n= 9$ ), or 3 (PFF:  $n=12$ , PBS:  $n=8$ ) months post injection. Across all age groups, a  
1040 significant increase in the beta band power in the OB of PFF seeded mice was observed  
1041 when compared to PBS treated. \*ANOVA. Solid data point indicates an animal whose  
1042 elevated OB beta power was associated with high OB Pser129 pathological burden.

1043

1044

1045

1046

1047

1048

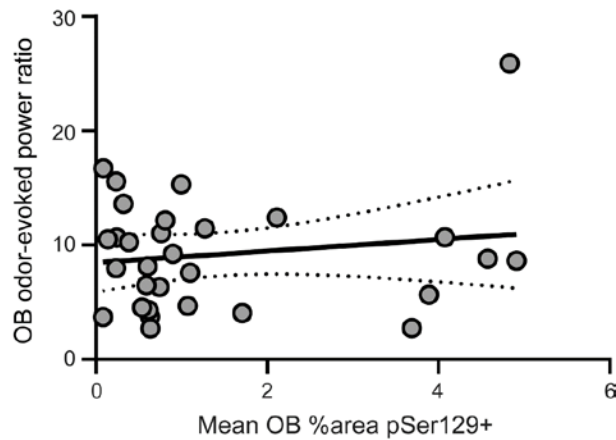

1049

1050 **Fig 9. Lack of statistical correlation between OB Pser129 burden and aberrant beta**  
1051 **band activity.** Scatterplot illustrating the relationship between the mean % area occupied  
1052 by Pser129 in the OB (as quantified in **Fig. 4**) and odor-evoked beta power (gray, 15-34  
1053 Hz). Gray dashed line indicates the linear fit bounded by 95% confidence intervals  
1054 (Pearson  $r(28) = 0.156$ ,  $p = 0.411$ ).
